# Supplementary material
Source: PubMed Central journal article supplement (PMC4860085)
Supplement: NIHMS742954-supplement-supplement_1.pdf [file NIHMS742954-supplement-supplement_1.pdf]

**SUPPLEMENTAL FIGURE LEGENDS**

**Supplemental Figure S1.** Overexpression of miR-194 reduces proliferation in HepaRG cells.

**(A):** Relative expression levels of *Ki-67* at day 14 and day 28 of hepatocytic differentiation process in HepaRG-miR-194 compared to HepaRG-empty cell lines. The results were presented as means  $\pm$  SEM from two independent experiments ( $P < 0.05$ ). **(B):** Proliferation of HepaRG-empty and HepaRG-miR-194 cell lines assessed by Ki-67 immunofluorescence staining at day 28 of hepatocytic differentiation process. Nuclei are stained with DAPI blue. Scale bar, 100  $\mu$ m.

**Supplemental Figure S2.** Deactivation of *YAP1* upon directed hepatocytic differentiation of

HepaRG cells and hESCs. **(A):** *YAP1* mRNA expression upon hepatocytic differentiation of liver progenitor HepaRG cells measured by quantitative PCR and shown as fold-changes and SEM, at day 28 relative to day 2, in two independent experiments. **(B):** Phospho-YAP1 and YAP1 protein expression levels upon hepatocytic differentiation of HepaRG cells determined respectively by western blot analysis. Expression of  $\alpha$ -tubulin was used to control protein loading. **(C):** *YAP1* mRNA expression during the hepatocyte differentiation process of hESCs. The graphs show fold-changes and SEM relative to day 0 in two independent experiments. **(D):** Phospho-YAP1 and YAP1 protein expression levels upon hepatocytic differentiation of hESCs determined respectively by western blot analysis. Expression of  $\alpha$ -tubulin was used to control protein loading.

## Supplemental Tables

Supplemental Table S1. Primers information for qRT-PCR analysis

| Gene Symbol (Human) | Forward Primer (5'-3')    | Reverse Primer (5'-3')  | Size |
|---------------------|---------------------------|-------------------------|------|
| ALB                 | gtcaactccaactctgtaga      | ttggtgactctgtcacttact   | 171  |
| ALDOB               | agtgcattctatgaacagtc      | gttgaagaccttactgttga    | 198  |
| BICD2               | ctccttgttacacatgttctt     | agtctaaagctacacgctatg   | 215  |
| CENPF               | aactcacatcagtaaagcaac     | agtgactcttaaggagggtgt   | 162  |
| CYP3A4              | aagtcgctcgaagatacaca      | aaggagagaacctgctcgtg    | 174  |
| ECT2                | agtagagcatcaagagcaata     | acgactcattacatgcttacc   | 162  |
| ELOVL6              | caggggtatatactagaacga     | atgcagtgaagatgaagttag   | 156  |
| FGFR3               | gtccttttcaggagaattag      | ttgcgtaagaagtgttaagtc   | 261  |
| GALNT7              | aaaggagtcttccaactagag     | ataaggcctaatacacaagg    | 211  |
| HAND1               | gacgcactgagagcatta        | atccgccttcttgagttc      | 197  |
| HDAC2               | aagaccagataacatgtctga     | ctgatgcttctgatttcttag   | 209  |
| HNF4A               | gaatgcgactctccaaaacc      | ggcactggttcctcttctgtct  | 339  |
| IGF1R               | tcattatccacagttctagc      | gatcaagttcaacagtgctc    | 260  |
| Ki-67               | ctgaggtctttgtattagcag     | tgactttgtctctaggtatgg   | 132  |
| NANOG               | ccgaagaatagcaatgggtgacg   | aggagaattggctggaactgc   | 303  |
| NOTCH2              | agttatacttgcttgtgtgct     | agtattcactccatccataca   | 231  |
| OCT4                | acatcaaagctctgcagaaagaact | ctgaataacctcccaatagacct | 127  |
| PRC1                | atgagtgttacagttgaaagc     | cagcaagtagaattatgtggt   | 145  |
| RACGAP1             | ctattgagactgtgcatatt      | gtctcgacacttcagagataa   | 251  |
| RAP2B               | tgagagaaattaggaacctg      | cccttatctcttcacacacta   | 112  |
| REV3L               | cagtaagcaaagaagtgttc      | ttagattgtgaaggagagcta   | 256  |
| RHEB                | ttcctcagacatactccatag     | cagtctgattttcttagcag    | 258  |
| THBS1               | tctgtgaaagttgtaaactcc     | ccagcataggtttatcatag    | 251  |
| YAP1                | ctctcgagatgagagtacaga     | taaggatgtcagaactcaaag   | 275  |

**Supplemental Table S2. MiRNAs that are significantly (P value < 0.05) downregulated during hepatocytic differentiation of HepaRG cells by at least 2 fold (FC HepaRG D/P). ~ indicates estimated changes from limit of detection.**

| miRNA                      | FC (HepaRG D/P) | P value |
|----------------------------|-----------------|---------|
| hsa-miR-122                | ~506.7          | 0.005   |
| hsa-miR-194                | ~459.8          | 0.008   |
| hsa-miR-135a               | ~166.0          | 0.006   |
| hsa-miR-1975               | 54.4            | 0.02    |
| hsa-miR-455-5p             | 50.9            | 0.05    |
| hsa-miR-210                | 46.7            | 0.008   |
| hsa-miR-146b-5p            | 44.2            | 0.006   |
| hsa-miR-509-3p             | 41.5            | 0.05    |
| hsa-miR-218                | 33.2            | 0.05    |
| hsa-miR-98                 | 32.8            | 0.03    |
| hsa-miR-296-5p             | 26.2            | 0.02    |
| hsa-miR-190b               | 26.2            | 0.008   |
| hsa-miR-769-5p             | 24.1            | 0.006   |
| hsa-miR-767-5p             | 21.9            | <0.001  |
| hsa-miR-520b               | 20.6            | 0.006   |
| hsa-miR-1263               | 19.1            | 0.05    |
| hsa-miR-363                | 19.3            | 0.01    |
| hsa-miR-493                | 19.3            | 0.01    |
| hsa-miR-590-3p             | 18.9            | 0.05    |
| hsa-miR-532-3p             | 18.8            | 0.02    |
| hsa-miR-1275               | 18.4            | 0.01    |
| hsa-miR-147                | 18.4            | 0.01    |
| hsa-miR-500+hsa-miR-501-5p | 18.0            | 0.02    |
| hsa-miR-326                | 18.0            | 0.007   |
| hsa-miR-570                | 17.9            | 0.03    |
| hsa-miR-656                | 17.2            | 0.006   |
| hsa-miR-1255a              | 17.1            | 0.04    |
| hsa-miR-184                | 16.5            | 0.05    |
| hsa-miR-1266               | 15.8            | 0.03    |
| hsa-miR-1183               | 15.7            | 0.05    |
| hsa-miR-330-3p             | 15.7            | 0.05    |
| hsa-miR-30b                | 4.7             | 0.04    |
| hsa-miR-30d                | 4.6             | 0.01    |
| hsa-miR-30a                | 4.1             | 0.05    |
| hsa-miR-26b                | 4.1             | 0.05    |
| hsa-miR-148a               | 3.8             | 0.04    |

|                |       |      |
|----------------|-------|------|
| hsa-miR-30e    | 3.8   | 0.05 |
| hsa-miR-26a    | 3.3   | 0.05 |
| hsa-miR-101    | 2.9   | 0.02 |
| hsa-miR-23b    | 2.5   | 0.02 |
| hsa-miR-128    | -2.0  | 0.05 |
| hsa-miR-223    | -2.6  | 0.05 |
| hsa-miR-92b    | -2.7  | 0.05 |
| hsa-miR-10a    | -2.8  | 0.03 |
| hsa-miR-221    | -2.9  | 0.05 |
| hsa-miR-421    | -3.0  | 0.02 |
| hsa-miR-18a    | -3.6  | 0.05 |
| hsa-miR-34c-5p | -3.8  | 0.05 |
| hsa-miR-145    | -42.7 | 0.05 |
| hsa-miR-1825   | -43.3 | 0.05 |
| hsa-miR-1181   | -44.6 | 0.04 |
| hsa-miR-1231   | -44.6 | 0.04 |

---

**Supplemental Table S3. Genes that are significantly (P value <0.05) downregulated during hepatocytic differentiation of HepaRG cells by at least 2 fold (FC HepaRG D/P) and that are predicted to be targets of miR-194 by at least two programs in miRwalk (Sum).**

| <b>Gene symbol</b> | <b>FC (HepaRG D/P)</b> | <b>P value</b> | <b>Sum</b> |
|--------------------|------------------------|----------------|------------|
| <b>ACTB</b>        | -2.64                  | 0.007          | 6          |
| <b>ACTG1</b>       | -2.62                  | <0.001         | 6          |
| <b>ACVR2B</b>      | -2.23                  | <0.001         | 6          |
| <b>ADAM10</b>      | -2.98                  | 0.015          | 6          |
| <b>AIM1</b>        | -2.26                  | 0.003          | 4          |
| <b>AP1G1</b>       | -4.95                  | 0.013          | 4          |
| <b>AP2B1</b>       | -3.15                  | 0.007          | 4          |
| <b>APC</b>         | -2.71                  | 0.005          | 4          |
| <b>ARF3</b>        | -2.02                  | 0.018          | 3          |
| <b>ARF4</b>        | -2.13                  | 0.003          | 7          |
| <b>ARF6</b>        | -2.16                  | 0.002          | 4          |
| <b>ASB1</b>        | -3.46                  | 0.008          | 6          |
| <b>ASB6</b>        | -2.63                  | 0.001          | 5          |
| <b>ASPH</b>        | -2.27                  | <0.001         | 4          |
| <b>ATM</b>         | -3.06                  | 0.002          | 5          |
| <b>ATP10D</b>      | -4.79                  | 0.027          | 5          |
| <b>ATP6V0A2</b>    | -2.59                  | 0.001          | 6          |
| <b>ATP6V1C1</b>    | -4.20                  | <0.001         | 5          |
| <b>ATP6V1H</b>     | -2.16                  | 0.025          | 6          |
| <b>B4GALT1</b>     | -2.05                  | 0.005          | 3          |
| <b>B4GALT4</b>     | -2.03                  | <0.001         | 5          |
| <b>BICD2</b>       | -14.24                 | 0.006          | 6          |
| <b>BIRC5</b>       | -16.11                 | 0.001          | 6          |
| <b>BLM</b>         | -3.12                  | 0.014          | 3          |
| <b>BNIP2</b>       | -3.01                  | 0.001          | 6          |
| <b>C9orf40</b>     | -3.20                  | 0.002          | 5          |
| <b>CAMK2G</b>      | -2.57                  | 0.007          | 7          |
| <b>CAMSAP1</b>     | -2.78                  | 0.006          | 5          |
| <b>CARD8</b>       | -2.43                  | 0.011          | 5          |
| <b>CASK</b>        | -2.03                  | 0.019          | 4          |
| <b>CBFB</b>        | -2.37                  | 0.04           | 5          |
| <b>CBLL1</b>       | -2.18                  | <0.001         | 3          |
| <b>CBX5</b>        | -4.71                  | 0.002          | 3          |
| <b>CCNT2</b>       | -4.92                  | <0.001         | 5          |
| <b>CCT5</b>        | -2.08                  | 0.045          | 5          |
| <b>CCT6A</b>       | -2.56                  | 0.032          | 3          |

|                 |        |        |   |
|-----------------|--------|--------|---|
| <b>CD2AP</b>    | -3.87  | 0.011  | 6 |
| <b>CD44</b>     | -3.44  | 0.049  | 3 |
| <b>CD47</b>     | -2.27  | 0.007  | 5 |
| <b>CDC25A</b>   | -14.81 | <0.001 | 3 |
| <b>CDC42BPA</b> | -2.69  | 0.001  | 5 |
| <b>CDKN1B</b>   | -2.04  | 0.001  | 6 |
| <b>CELSR1</b>   | -2.02  | 0.01   | 5 |
| <b>CENPF</b>    | -3.09  | 0.004  | 5 |
| <b>CHORDC1</b>  | -4.23  | <0.001 | 3 |
| <b>CHSY1</b>    | -3.66  | 0.012  | 5 |
| <b>CIT</b>      | -5.43  | <0.001 | 4 |
| <b>CLASP2</b>   | -2.08  | 0.001  | 5 |
| <b>CLCN4</b>    | -4.10  | 0.009  | 4 |
| <b>CLN5</b>     | -2.48  | 0.008  | 3 |
| <b>CNTNAP2</b>  | -3.46  | 0.002  | 6 |
| <b>COIL</b>     | -9.92  | 0.015  | 3 |
| <b>COPS7B</b>   | -2.07  | 0.002  | 5 |
| <b>CORO1C</b>   | -9.70  | 0.004  | 5 |
| <b>CPSF6</b>    | -3.20  | 0.001  | 4 |
| <b>CREBBP</b>   | -2.16  | 0.001  | 5 |
| <b>CSE1L</b>    | -4.90  | 0.014  | 8 |
| <b>CSTF3</b>    | -2.02  | 0.027  | 5 |
| <b>CTDSPL</b>   | -2.82  | 0.004  | 5 |
| <b>CTPS</b>     | -6.65  | <0.001 | 3 |
| <b>CUL3</b>     | -2.05  | <0.001 | 5 |
| <b>CUL4A</b>    | -2.18  | 0.018  | 4 |
| <b>CXCL10</b>   | -3.40  | <0.001 | 6 |
| <b>CYR61</b>    | -7.03  | 0.005  | 3 |
| <b>DCK</b>      | -4.49  | <0.001 | 5 |
| <b>DCP2</b>     | -5.06  | <0.001 | 6 |
| <b>DDEF1</b>    | -6.91  | 0.039  | 8 |
| <b>DDX10</b>    | -3.82  | 0.001  | 3 |
| <b>DDX11</b>    | -6.55  | 0.001  | 3 |
| <b>DDX18</b>    | -2.82  | 0.011  | 5 |
| <b>DDX46</b>    | -3.63  | <0.001 | 5 |
| <b>DENR</b>     | -2.98  | 0.008  | 3 |
| <b>DFNA5</b>    | -7.62  | 0.03   | 4 |
| <b>DHX15</b>    | -2.33  | <0.001 | 7 |
| <b>DISC1</b>    | -2.26  | 0.015  | 6 |
| <b>DIXDC1</b>   | -4.69  | 0.035  | 4 |
| <b>DNAJC6</b>   | -6.66  | 0.024  | 4 |
| <b>DPYSL3</b>   | -8.64  | 0.001  | 6 |
| <b>DR1</b>      | -2.36  | 0.003  | 7 |

|                 |        |        |   |
|-----------------|--------|--------|---|
| <b>DUSP1</b>    | -2.94  | 0.012  | 5 |
| <b>DYRK2</b>    | -2.14  | <0.001 | 5 |
| <b>E2F3</b>     | -7.09  | 0.021  | 6 |
| <b>ECT2</b>     | -22.46 | <0.001 | 6 |
| <b>EDN1</b>     | -10.91 | 0.002  | 6 |
| <b>EIF2S2</b>   | -2.01  | 0.009  | 5 |
| <b>ELF2</b>     | -2.11  | 0.024  | 6 |
| <b>ELOVL6</b>   | -3.63  | 0.027  | 3 |
| <b>ENAH</b>     | -4.89  | 0.007  | 5 |
| <b>EPB41L2</b>  | -6.90  | <0.001 | 3 |
| <b>EPB41L4B</b> | -2.50  | 0.026  | 5 |
| <b>EXTL2</b>    | -2.24  | 0.004  | 3 |
| <b>FAM20B</b>   | -2.74  | 0.007  | 5 |
| <b>FCGR2B</b>   | -2.60  | <0.001 | 5 |
| <b>FECH</b>     | -3.56  | 0.003  | 3 |
| <b>FEN1</b>     | -9.14  | 0.001  | 5 |
| <b>FGFR1</b>    | -2.48  | 0.004  | 5 |
| <b>FGFR3</b>    | -2.83  | 0.021  | 5 |
| <b>FMR1</b>     | -3.53  | 0.009  | 6 |
| <b>FTSJ1</b>    | -4.26  | <0.001 | 4 |
| <b>FUBP3</b>    | -2.54  | 0.001  | 3 |
| <b>FUS</b>      | -2.49  | <0.001 | 3 |
| <b>FUT4</b>     | -6.83  | <0.001 | 3 |
| <b>GAD1</b>     | -2.05  | 0.039  | 7 |
| <b>GALNT7</b>   | -5.96  | <0.001 | 5 |
| <b>GBF1</b>     | -4.07  | 0.026  | 3 |
| <b>GCC1</b>     | -2.76  | 0.003  | 5 |
| <b>GGA1</b>     | -2.09  | 0.031  | 3 |
| <b>GGA2</b>     | -3.55  | 0.002  | 5 |
| <b>GGA3</b>     | -2.71  | 0.017  | 6 |
| <b>GGCX</b>     | -2.03  | 0.005  | 3 |
| <b>GMDS</b>     | -2.42  | 0.003  | 5 |
| <b>GMEB2</b>    | -2.65  | 0.033  | 5 |
| <b>GMFB</b>     | -2.48  | 0.005  | 6 |
| <b>GNAI3</b>    | -3.21  | <0.001 | 3 |
| <b>GORASP2</b>  | -2.60  | 0.006  | 5 |
| <b>GPD2</b>     | -3.91  | 0.009  | 4 |
| <b>GRSF1</b>    | -2.23  | 0.001  | 3 |
| <b>GSPT1</b>    | -2.43  | 0.008  | 4 |
| <b>GTF2A2</b>   | -2.41  | 0.006  | 3 |
| <b>GTF2E2</b>   | -2.00  | 0.002  | 5 |
| <b>GTF2H1</b>   | -2.03  | 0.004  | 6 |
| <b>HBS1L</b>    | -3.29  | <0.001 | 4 |

|                 |        |        |   |
|-----------------|--------|--------|---|
| <b>HDAC2</b>    | -3.07  | 0.006  | 5 |
| <b>HIF1A</b>    | -2.79  | 0.043  | 5 |
| <b>HIVEP2</b>   | -3.05  | 0.034  | 3 |
| <b>HMGB1</b>    | -2.89  | 0.002  | 5 |
| <b>HOXB5</b>    | -2.49  | <0.001 | 3 |
| <b>HS2ST1</b>   | -2.58  | 0.007  | 4 |
| <b>HSPA12A</b>  | -2.68  | 0.027  | 3 |
| <b>IDS</b>      | -2.31  | <0.001 | 3 |
| <b>IGF1R</b>    | -2.16  | 0.019  | 4 |
| <b>IGSF3</b>    | -2.44  | 0.001  | 5 |
| <b>IL2RB</b>    | -2.79  | <0.001 | 4 |
| <b>IPO4</b>     | -2.95  | <0.001 | 6 |
| <b>ITGB3</b>    | -2.40  | <0.001 | 5 |
| <b>KARS</b>     | -2.41  | 0.003  | 3 |
| <b>KCTD15</b>   | -3.26  | <0.001 | 5 |
| <b>KCTD7</b>    | -4.83  | 0.002  | 3 |
| <b>KIAA0226</b> | -4.90  | 0.048  | 5 |
| <b>KIAA0241</b> | -2.72  | 0.003  | 6 |
| <b>KIAA0317</b> | -2.98  | 0.045  | 5 |
| <b>KIAA0888</b> | -2.05  | <0.001 | 5 |
| <b>KIAA1128</b> | -4.50  | 0.017  | 5 |
| <b>KIAA1219</b> | -4.41  | 0.011  | 5 |
| <b>KLHL4</b>    | -3.89  | 0.008  | 4 |
| <b>KPNA1</b>    | -2.45  | <0.001 | 5 |
| <b>KPNB1</b>    | -2.77  | 0.004  | 5 |
| <b>LIN7C</b>    | -2.58  | <0.001 | 6 |
| <b>LPHN2</b>    | -5.24  | <0.001 | 7 |
| <b>LPP</b>      | -3.49  | 0.044  | 3 |
| <b>MAN1A2</b>   | -2.08  | 0.006  | 5 |
| <b>MAP1B</b>    | -4.39  | 0.006  | 4 |
| <b>MAP4K5</b>   | -2.35  | 0.022  | 5 |
| <b>MAPRE1</b>   | -2.06  | 0.008  | 5 |
| <b>MARCKS</b>   | -5.04  | 0.002  | 3 |
| <b>MBP</b>      | -2.10  | <0.001 | 3 |
| <b>MCL1</b>     | -3.59  | 0.001  | 5 |
| <b>MCM10</b>    | -12.04 | 0.019  | 3 |
| <b>MKLN1</b>    | -3.01  | 0.007  | 6 |
| <b>MLL</b>      | -2.21  | 0.003  | 3 |
| <b>MLLT3</b>    | -5.14  | 0.001  | 6 |
| <b>MMP24</b>    | -6.19  | 0.043  | 3 |
| <b>MPHOSPH1</b> | -11.00 | <0.001 | 3 |
| <b>MPHOSPH6</b> | -5.19  | 0.001  | 5 |
| <b>MPP5</b>     | -2.75  | 0.002  | 5 |



|                 |        |        |   |
|-----------------|--------|--------|---|
| <b>MRE11A</b>   | -4.24  | <0.001 | 4 |
| <b>MRP63</b>    | -2.34  | 0.004  | 5 |
| <b>MTF1</b>     | -2.85  | 0.004  | 5 |
| <b>MTMR2</b>    | -6.16  | <0.001 | 3 |
| <b>MTMR6</b>    | -3.30  | 0.003  | 5 |
| <b>MYO1C</b>    | -2.47  | 0.01   | 4 |
| <b>MYO5A</b>    | -2.52  | 0.023  | 6 |
| <b>NAP1L1</b>   | -2.04  | 0.001  | 4 |
| <b>NCL</b>      | -2.47  | 0.005  | 6 |
| <b>NFATC1</b>   | -3.88  | <0.001 | 4 |
| <b>NOLC1</b>    | -2.01  | 0.018  | 4 |
| <b>NOTCH2</b>   | -2.26  | 0.031  | 3 |
| <b>NPAT</b>     | -3.97  | <0.001 | 5 |
| <b>NR2F2</b>    | -2.16  | 0.004  | 7 |
| <b>NRCAM</b>    | -3.03  | 0.001  | 4 |
| <b>NSD1</b>     | -2.73  | <0.001 | 3 |
| <b>NUDT4</b>    | -2.49  | 0.003  | 5 |
| <b>NUFIP1</b>   | -2.22  | 0.013  | 5 |
| <b>NUP50</b>    | -3.12  | <0.001 | 6 |
| <b>NVL</b>      | -7.34  | <0.001 | 7 |
| <b>OCRL</b>     | -2.39  | 0.011  | 4 |
| <b>OSBPL3</b>   | -4.59  | 0.016  | 5 |
| <b>PAFAH1B1</b> | -2.01  | 0.014  | 7 |
| <b>PCM1</b>     | -2.67  | <0.001 | 4 |
| <b>PCNX</b>     | -4.80  | 0.005  | 4 |
| <b>PDE4D</b>    | -3.50  | 0.001  | 5 |
| <b>PDXK</b>     | -2.04  | 0.013  | 3 |
| <b>PEA15</b>    | -3.38  | 0.041  | 5 |
| <b>PEX3</b>     | -2.85  | 0.001  | 5 |
| <b>PFDN4</b>    | -2.91  | 0.002  | 5 |
| <b>PHLDA1</b>   | -3.11  | <0.001 | 5 |
| <b>PIGA</b>     | -2.48  | 0.018  | 4 |
| <b>PKNOX1</b>   | -2.17  | 0.025  | 3 |
| <b>PLAA</b>     | -2.57  | 0.001  | 4 |
| <b>PLAGL2</b>   | -3.91  | 0.001  | 3 |
| <b>PLEK2</b>    | -3.62  | 0.005  | 5 |
| <b>POLD3</b>    | -4.43  | <0.001 | 5 |
| <b>POLI</b>     | -2.16  | 0.002  | 4 |
| <b>PPAT</b>     | -2.38  | 0.021  | 5 |
| <b>PPP2R1B</b>  | -3.26  | 0.013  | 4 |
| <b>PRC1</b>     | -42.38 | 0.001  | 5 |
| <b>PRDM10</b>   | -3.62  | 0.001  | 5 |
| <b>PRMT3</b>    | -3.41  | 0.019  | 5 |

|                 |        |        |   |
|-----------------|--------|--------|---|
| <b>PRPF4</b>    | -2.65  | 0.016  | 3 |
| <b>PRPF4B</b>   | -2.51  | 0.009  | 5 |
| <b>PSME3</b>    | -2.34  | 0.049  | 4 |
| <b>PSME4</b>    | -3.30  | 0.001  | 6 |
| <b>PTBP1</b>    | -2.57  | <0.001 | 5 |
| <b>PTPN2</b>    | -2.73  | 0.001  | 6 |
| <b>QRSL1</b>    | -2.29  | 0.027  | 5 |
| <b>RACGAP1</b>  | -14.43 | <0.001 | 3 |
| <b>RAD1</b>     | -2.82  | <0.001 | 3 |
| <b>RAD21</b>    | -3.21  | <0.001 | 5 |
| <b>RAD51</b>    | -6.21  | <0.001 | 5 |
| <b>RANBP2</b>   | -2.21  | 0.01   | 4 |
| <b>RAP2B</b>    | -3.81  | 0.006  | 5 |
| <b>RB1</b>      | -6.76  | 0.011  | 3 |
| <b>RELB</b>     | -2.83  | 0.001  | 5 |
| <b>REV3L</b>    | -2.60  | 0.027  | 7 |
| <b>RFC5</b>     | -3.06  | 0.002  | 4 |
| <b>RHEB</b>     | -2.27  | 0.001  | 5 |
| <b>RHOBTB1</b>  | -4.76  | 0.044  | 5 |
| <b>RIF1</b>     | -2.94  | 0.001  | 3 |
| <b>RNF111</b>   | -2.53  | 0.009  | 5 |
| <b>RNGTT</b>    | -2.49  | <0.001 | 5 |
| <b>RPA2</b>     | -2.48  | 0.001  | 5 |
| <b>RPIA</b>     | -5.88  | <0.001 | 5 |
| <b>RRAS2</b>    | -4.12  | 0.035  | 5 |
| <b>RUNX1</b>    | -3.64  | 0.008  | 4 |
| <b>SAV1</b>     | -2.46  | <0.001 | 5 |
| <b>SCHIP1</b>   | -15.08 | 0.021  | 5 |
| <b>SEC23B</b>   | -2.14  | 0.006  | 5 |
| <b>SEPHS1</b>   | -2.19  | 0.002  | 8 |
| <b>SERPINE2</b> | -5.04  | 0.016  | 6 |
| <b>SF3B4</b>    | -2.02  | 0.003  | 5 |
| <b>SFRS1</b>    | -2.37  | 0.028  | 3 |
| <b>SFRS10</b>   | -2.22  | <0.001 | 6 |
| <b>SFRS11</b>   | -2.17  | <0.001 | 5 |
| <b>SFRS7</b>    | -4.14  | 0.029  | 4 |
| <b>SLBP</b>     | -3.64  | 0.011  | 6 |
| <b>SLC16A1</b>  | -2.64  | <0.001 | 5 |
| <b>SLC25A14</b> | -2.05  | 0.002  | 5 |
| <b>SLC26A2</b>  | -5.82  | 0.012  | 5 |
| <b>SLC30A1</b>  | -2.03  | 0.02   | 5 |
| <b>SLC31A1</b>  | -2.00  | 0.006  | 5 |
| <b>SLC35C1</b>  | -2.62  | 0.012  | 4 |

|                 |        |        |   |
|-----------------|--------|--------|---|
| <b>SLC39A6</b>  | -6.07  | 0.011  | 5 |
| <b>SLC7A1</b>   | -4.30  | <0.001 | 3 |
| <b>SLC7A11</b>  | -11.36 | 0.017  | 4 |
| <b>SLC7A6</b>   | -3.46  | 0.009  | 4 |
| <b>SLC9A3R1</b> | -2.91  | 0.013  | 5 |
| <b>SMARCC1</b>  | -6.39  | 0.011  | 5 |
| <b>SMURF1</b>   | -2.00  | 0.001  | 4 |
| <b>SNAPC1</b>   | -8.50  | 0.023  | 3 |
| <b>SNRPE</b>    | -2.84  | 0.011  | 3 |
| <b>SNX11</b>    | -3.32  | 0.002  | 4 |
| <b>SNX5</b>     | -2.31  | 0.004  | 4 |
| <b>SOCS2</b>    | -3.34  | 0.033  | 6 |
| <b>SP3</b>      | -4.34  | 0.007  | 6 |
| <b>SPATS2</b>   | -3.77  | <0.001 | 5 |
| <b>SPTLC2</b>   | -2.44  | <0.001 | 5 |
| <b>U2SURP</b>   | -4.55  | 0.001  | 3 |
| <b>SRI</b>      | -2.42  | 0.019  | 6 |
| <b>SRM</b>      | -2.92  | 0.008  | 5 |
| <b>SRP72</b>    | -2.31  | 0.004  | 6 |
| <b>SRR</b>      | -2.19  | 0.022  | 4 |
| <b>SS18</b>     | -2.02  | <0.001 | 7 |
| <b>STAC</b>     | -2.48  | 0.037  | 4 |
| <b>STAT5B</b>   | -2.04  | <0.001 | 6 |
| <b>STK24</b>    | -2.19  | 0.014  | 5 |
| <b>STK38L</b>   | -6.83  | 0.019  | 5 |
| <b>STMN1</b>    | -2.67  | <0.001 | 4 |
| <b>STX6</b>     | -2.49  | 0.005  | 6 |
| <b>SWAP70</b>   | -4.13  | 0.007  | 3 |
| <b>SYNJ2</b>    | -3.27  | 0.004  | 5 |
| <b>TAF5L</b>    | -4.27  | <0.001 | 3 |
| <b>TBL2</b>     | -2.48  | 0.001  | 5 |
| <b>TFAM</b>     | -4.15  | 0.001  | 5 |
| <b>THAP10</b>   | -4.39  | 0.008  | 8 |
| <b>THBS1</b>    | -4.19  | 0.037  | 6 |
| <b>TJP1</b>     | -6.40  | 0.009  | 7 |
| <b>TPD52L2</b>  | -2.16  | 0.005  | 6 |
| <b>TRAF1</b>    | -3.62  | <0.001 | 5 |
| <b>TRAM2</b>    | -5.40  | <0.001 | 4 |
| <b>TRPA1</b>    | -3.29  | 0.021  | 3 |
| <b>TTC4</b>     | -5.45  | <0.001 | 4 |
| <b>TULP4</b>    | -2.92  | 0.03   | 5 |
| <b>UBA2</b>     | -2.18  | 0.008  | 7 |
| <b>UBE2B</b>    | -2.01  | 0.011  | 5 |

|                |        |        |   |
|----------------|--------|--------|---|
| <b>UBE2V2</b>  | -5.18  | <0.001 | 7 |
| <b>UBE3A</b>   | -2.48  | 0.002  | 4 |
| <b>UBE4A</b>   | -2.41  | 0.018  | 4 |
| <b>UFD1L</b>   | -3.55  | <0.001 | 6 |
| <b>USP46</b>   | -2.37  | 0.005  | 4 |
| <b>VAPB</b>    | -2.32  | <0.001 | 3 |
| <b>WEE1</b>    | -4.40  | 0.002  | 4 |
| <b>WRN</b>     | -2.36  | <0.001 | 6 |
| <b>WTAP</b>    | -2.79  | 0.001  | 3 |
| <b>XPO7</b>    | -2.10  | 0.043  | 4 |
| <b>YAP1</b>    | -2.55  | <0.001 | 4 |
| <b>YES1</b>    | -2.82  | 0.019  | 5 |
| <b>YWHAB</b>   | -4.87  | 0.002  | 3 |
| <b>ZAK</b>     | -2.38  | 0.001  | 3 |
| <b>ZC3HAV1</b> | -2.08  | 0.001  | 6 |
| <b>ZCCHC2</b>  | -3.27  | 0.04   | 5 |
| <b>ZFX</b>     | -3.15  | 0.009  | 4 |
| <b>ZFYVE16</b> | -3.35  | 0.023  | 3 |
| <b>ZNF180</b>  | -2.18  | 0.004  | 6 |
| <b>ZNF202</b>  | -3.23  | <0.001 | 6 |
| <b>ZNF22</b>   | -2.30  | <0.001 | 5 |
| <b>ZNF330</b>  | -2.74  | 0.015  | 5 |
| <b>ZNF337</b>  | -2.54  | <0.001 | 4 |
| <b>ZNF473</b>  | -2.81  | 0.024  | 4 |
| <b>ZWINT</b>   | -12.56 | 0.003  | 5 |

---

**Supplemental Table S4. Expression changes (fold change and p value) of 16 predicted miR-194 target genes upon miR-194 overexpression in HepaRG cells (HepaRG-miR-194 cell lines vs HepaRG-empty cell lines) and in hESCs (hESC-miR-194 cell lines vs hESC-empty cell lines).**

| <b>Gene Symbol</b> | <b>Gene description</b>                                     | <b>FC HepaRG</b> | <b>P value</b> | <b>FC hESC</b> | <b>P value</b> |
|--------------------|-------------------------------------------------------------|------------------|----------------|----------------|----------------|
| BICD2              | bicaudal D homolog 2 (Drosophila)                           | -3.6             | 0.010          | -1.3           | 0.011          |
| CENPF              | centromere protein F, 350/400ka (mitosin)                   | -3.3             | 0.005          | -1.6           | 0.004          |
| ECT2               | epithelial cell transforming sequence 2 oncogene            | -2.0             | 0.012          | -1.6           | <0.001         |
| ELOVL6             | ELOVL family member 6, elongation of long chain fatty acids | -2.5             | 0.008          | -1.6           | 0.023          |
| FGFR3              | fibroblast growth factor receptor 3                         | -2.3             | 0.048          | -1.5           | 0.040          |
| GALNT7             | polypeptide N-acetylgalacto-saminyltransferase 7            | -2.6             | 0.004          | -1.8           | 0.004          |
| HDAC2              | histone deacetylase 2                                       | -1.8             | 0.005          | -1.7           | 0.001          |
| IGF1R              | insulin-like growth factor 1 receptor                       | -2.0             | 0.025          | -1.6           | <0.001         |
| NOTCH2             | Notch homolog 2 (Drosophila)                                | -1.9             | 0.001          | -1.5           | <0.001         |
| PRC1               | protein regulator of cytokinesis 1                          | -3.9             | < 0.001        | -1.3           | 0.002          |
| RACGAP1            | Rac GTPase activating protein 1                             | -3.2             | 0.002          | -1.5           | 0.000          |
| RAP2B              | RAP2B, member of RAS oncogene family                        | -3.0             | 0.030          | -1.5           | 0.003          |
| REV3L              | REV3-like, polymerase zeta, catalytic subunit               | -2.6             | 0.001          | -1.2           | 0.028          |
| RHEB               | Ras homolog enriched in brain                               | -2.7             | 0.009          | -2.0           | <0.001         |
| THBS1              | thrombospondin 1                                            | -8.8             | 0.026          | -2.3           | 0.000          |
| YAP1               | Yes-associated protein 1                                    | -1.8             | 0.029          | -1.7           | 0.003          |

Supplementary Figure S1

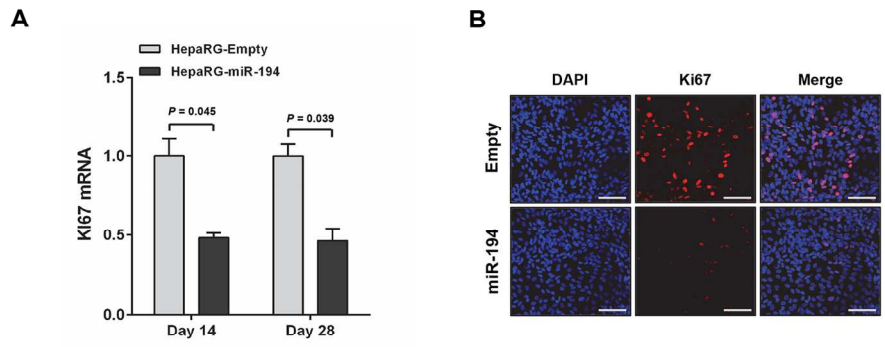

147x76mm (300 x 300 DPI)

Supplementary Figure S2

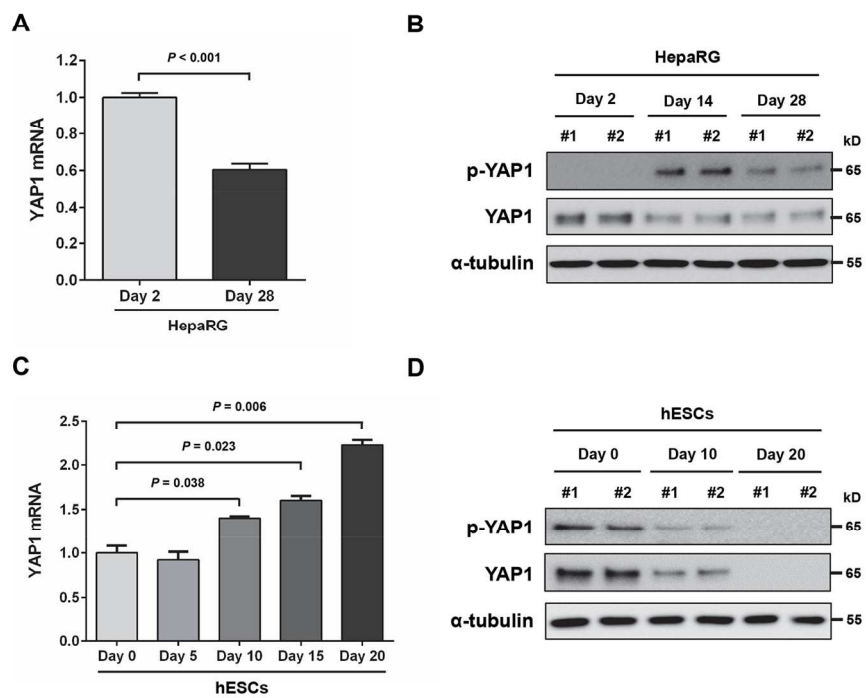

147x119mm (300 x 300 DPI)
